# Supplementary material for: Plasmon-coupled 3D porous hotspot architecture for super-sensitive quantitative SERS sensing of toxic substances on real sample surfaces
Source: Royal Society of Chemistry journal article supplement (doi:10.1039/c9cp03058a), 2019-01-01
Supplement: c9cp03058a1.pdf [file c9cp03058a1.pdf]

## **Plasmon-coupled 3D porous hotspots architecture for super-sensitive quantitative SERS sensing of toxic substances on real sample surface**

Maofeng Zhang, <sup>\*a</sup> Jian Yang <sup>b</sup>, Yaru Wang, <sup>a</sup> Haoran Sun, <sup>b</sup> Hongyang Zhou, <sup>a</sup> Xiaonan Liu, <sup>b</sup> Cheng Ye, <sup>a</sup> Zhiyong Bao, <sup>b</sup> Jiaqin Liu, <sup>\*c</sup> and Yucheng Wu <sup>b</sup>

*a. School of Chemistry and Chemical Engineering, Hefei University of Technology, 193 Tunxi Road, Hefei, 230009, China*

*b. School of Materials Science and Engineering, Hefei University of Technology, 193 Tunxi Road, Hefei, 230009, China*

*c. Institute of Industry and Equipment Technology, Hefei University of Technology, 193 Tunxi Road, Hefei, 230009, China*

\*Corresponding authors:

Email: mfzhang@hfut.edu.cn (M. F. Zhang); jqliu@hfut.edu.cn (J. Q. Liu)

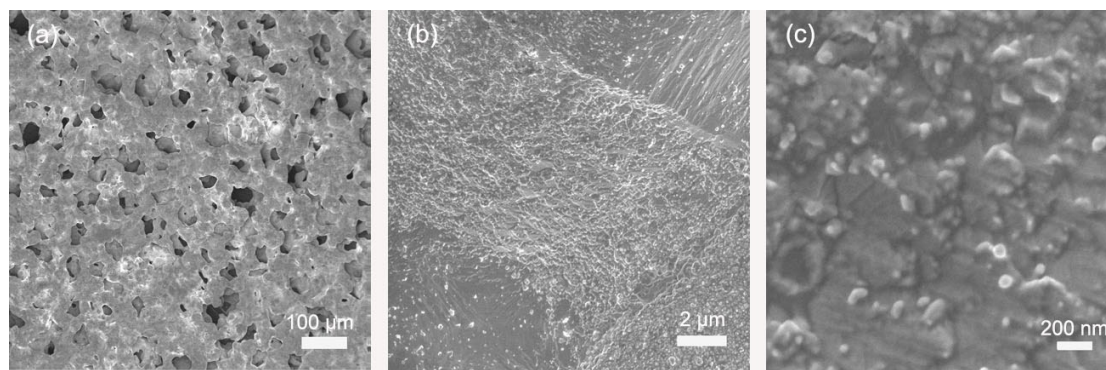

**Figure S1.** SEM images of low and high-magnification of cleaned 3D Cu foam with porosity of 80 %, indicating their porous structure and rough surface.

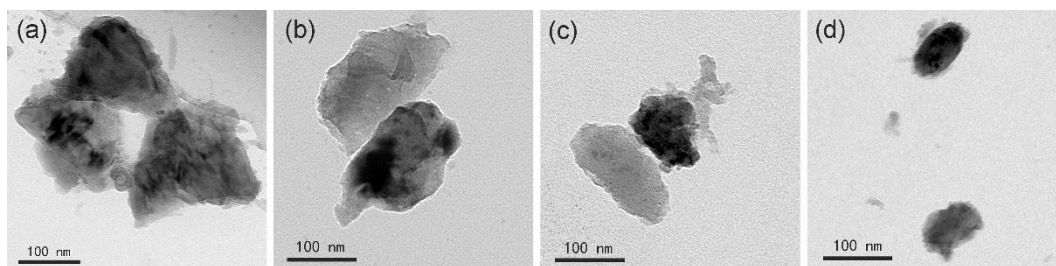

**Figure S2.** HRTEM images of four typical AgNPs prepared with different porosity of Cu foam (a) 70 %, (b) 80 %, (c) 90 %, and (d) 98 %.

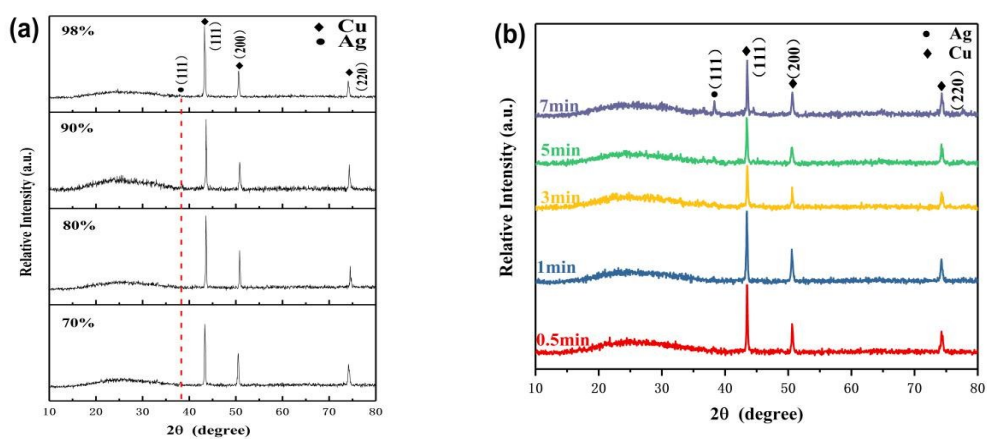

**Figure S3.** XRD patterns of AgNPs/Cu foam with (a) different porosity of Cu foam, and (b) different soaking time in  $\text{AgNO}_3$  solution.

## Calculation of enhancement factor (EF)

$$N_{\text{BULK}} = (\text{Laser spot area}/\text{Diffusion area}) * (N_A * \text{Volume}_{\text{BULK}} * \text{Concentration}_{\text{BULK}})$$

$$N_{\text{SERS}} = (\text{Laser spot area}/\text{Substrate area}) * (N_A * \text{Volume}_{\text{SERS}} * \text{Concentration}_{\text{SERS}})$$

$$\text{Diffusion area} = \pi(d/2)^2 = 0.5027 \text{ cm}^2$$

$$\text{Substrate area} = 0.25 \text{ cm}^2$$

$$\text{Volume}_{\text{BULK}} = \text{Volume}_{\text{SERS}}$$

$$I = \text{intensity of the } 1172 \text{ cm}^{-1} \text{ peak}$$

$$\text{Concentration}_{\text{BULK}} = 10^4 * \text{Concentration}_{\text{SERS}}$$

$$N_{\text{BULK}} / N_{\text{SERS}} = (0.25/0.5027) \times 10^4 = 4973$$

$$I_{\text{BULK}} = 7989 \text{ a.u.}$$

$$I_{\text{SERS, AgNPs}} = 119606 \text{ a.u.}$$

$$I_{\text{SERS, AgNPs}} / I_{\text{BULK}} = 14.97$$

$$\text{EF} = (I_{\text{SERS}} / I_{\text{BULK}}) \times (N_{\text{BULK}} / N_{\text{SERS}}) = 7.45 \times 10^4$$

$$\text{Concentration}_{\text{BULK}} = 10^7 * \text{Concentration}_{\text{SERS}}$$

$$N_{\text{BULK}} / N_{\text{SERS}} = (0.25/0.5027) \times 10^7 = 4.97 \times 10^6$$

$$I_{\text{SERS, AgNPs/Cu foam}} = 66190.88 \text{ a.u.}$$

$$I_{\text{SERS, AgNPs/Cu foam}} / I_{\text{BULK}} = 8.28$$

$$\text{EF} = (I_{\text{SERS}} / I_{\text{BULK}}) \times (N_{\text{BULK}} / N_{\text{SERS}}) = 4.12 \times 10^7$$

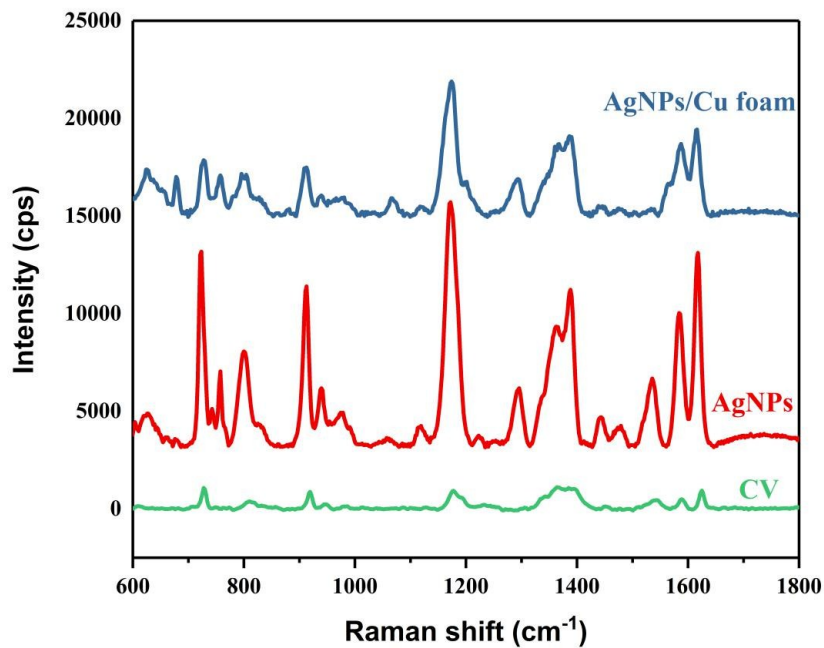

**Figure S4.** Normal Raman spectra of CV aqueous solution ( $10^{-1}$  M), SERS spectra of CV ( $10^{-5}$  M) absorbed on AgNPs and SERS spectra of CV ( $10^{-8}$  M) absorbed on AgNPs/Cu composites.

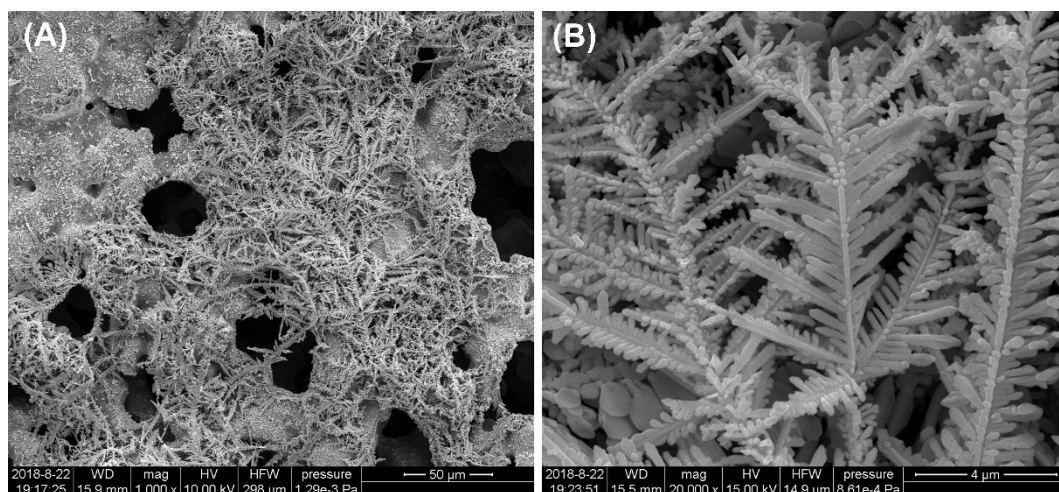

**Figure S5.** SEM images of Ag/Cu foam fabricated without using  $\text{Sn}^{2+}$  ions.

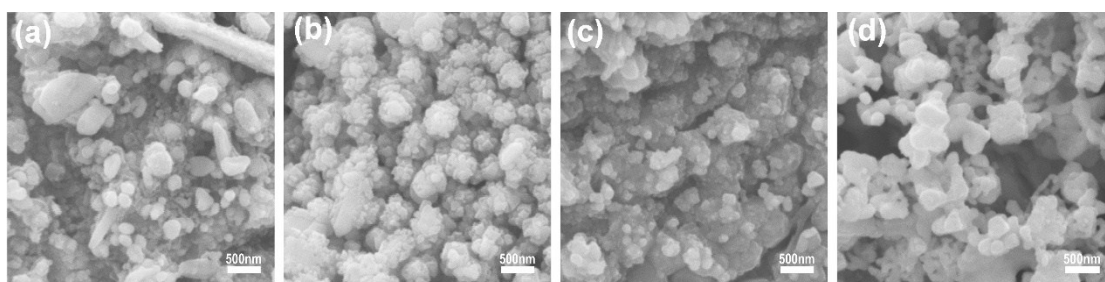

**Figure S6.** SEM images of AgNPs/Cu foam fabricated at different reaction time. (a) 1min, (b) 3min, (c) 5min, (d) 7min.

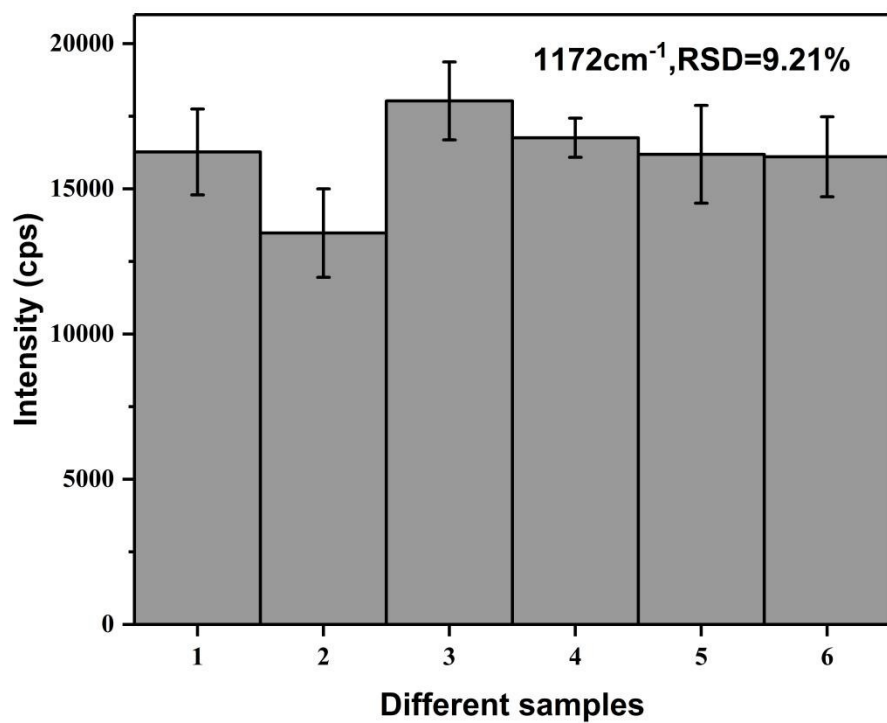

**Figure S7.** The Raman intensity RSD value of inter-substrate variation obtained at 1172 cm<sup>-1</sup> peak.

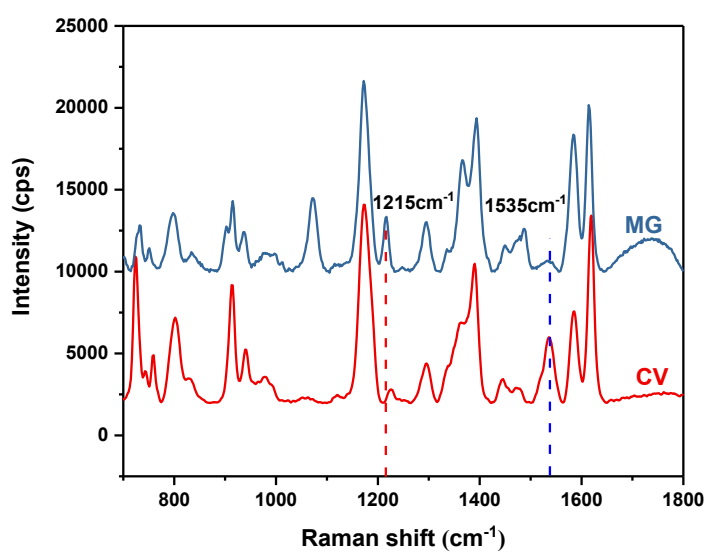

**Figure S8.** Comparison of SERS spectra of CV and MG.

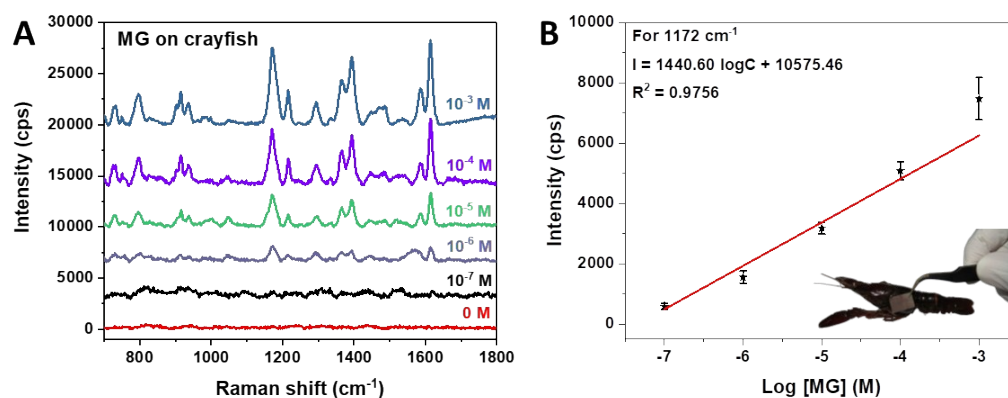

**Figure S9.** (A) SERS spectra of MG detected on the surface of crayfish with different concentrations. (B) Relationship between Raman intensities and the concentrations of MG at 1172 cm<sup>-1</sup> in logarithm scale.

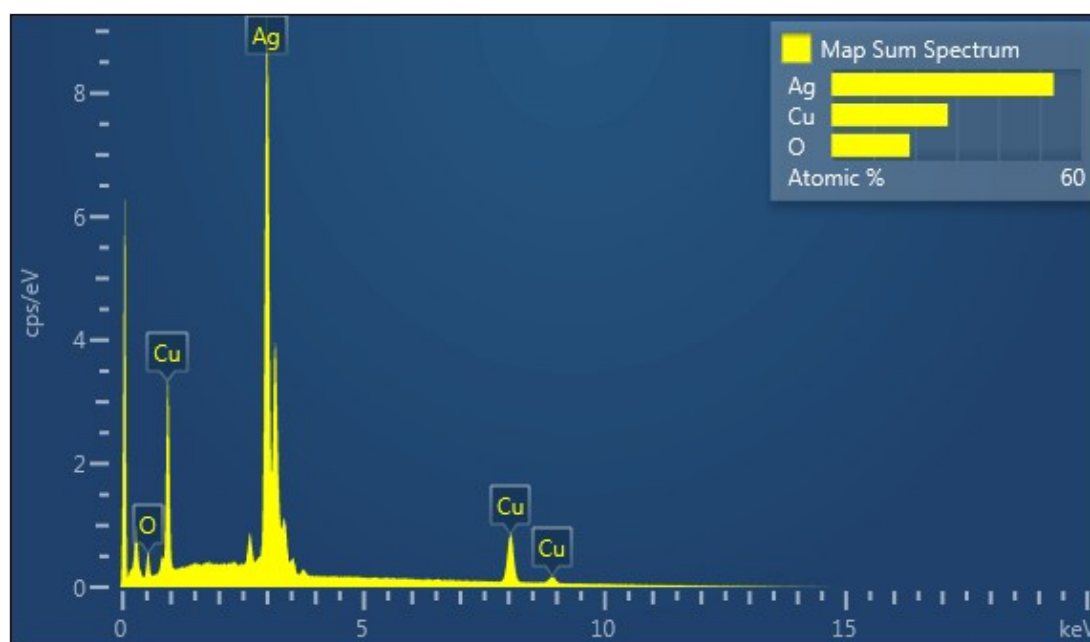

**Figure S10.** EDX map of the freshly prepared AgNPs/Cu foam, indicating a high content of Ag.

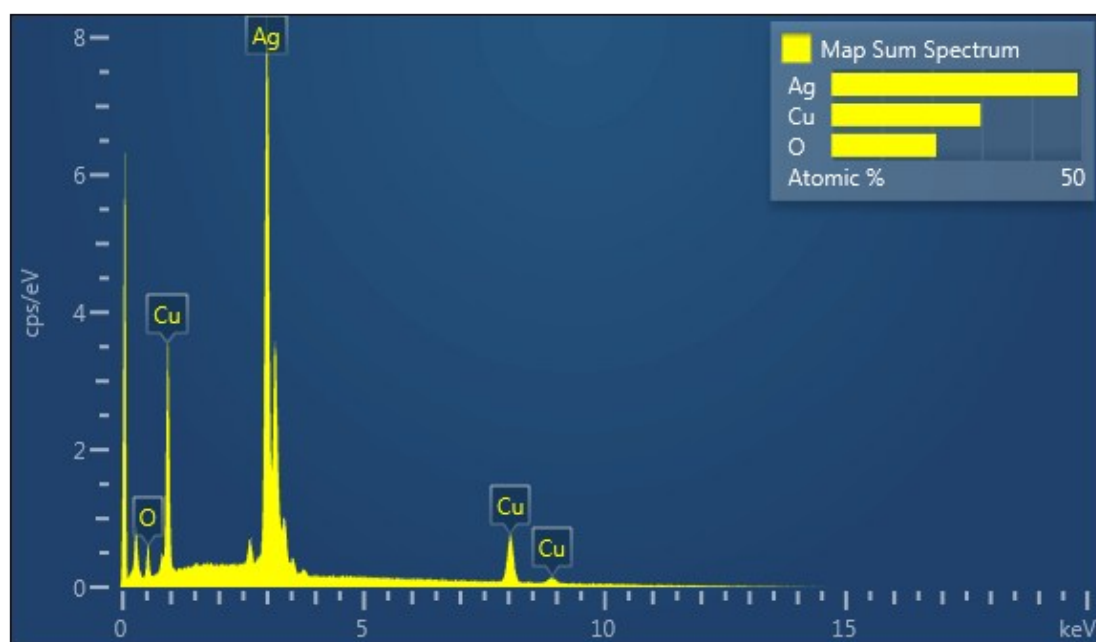

**Figure S11.** EDX map of the AgNPs/Cu foam stored for 10 days, indicating a decreased content of Ag and increased O element content.

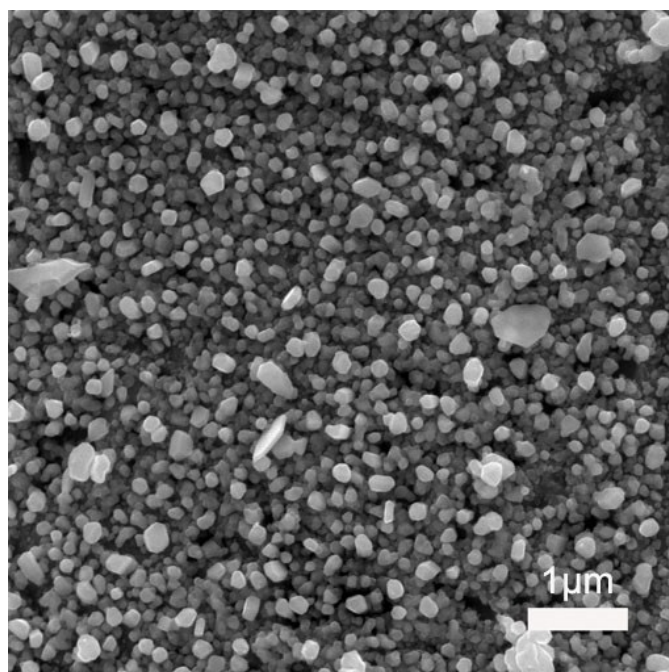

**Figure S12.** SEM image the AgNPs/Cu foam stored for 10 days.
